# Supplementary material for: Impact of a Moderately Hypocaloric Mediterranean Diet on the Gut Microbiota Composition of Italian Obese Patients
Source: PubMed Central journal article supplement (PMC7551852; doi:10.3390/nu12092707), 2020-09-04
Supplement: nutrients-12-02707-s001.pdf [file nutrients-12-02707-s001.pdf]

**Table S1.** Differences in the anthropometric data before and after the nutritional intervention (NI) by BMI categories, evaluated by one-way ANOVA with repeated measures.

| Anthropometric variable before and after the NI |           | Overweight (N= 3), M(SD) | Obesity class I (N=8), M(SD) | Obesity class II (N=9), M(SD) | Obesity class III (N=3), M(SD) |
|-------------------------------------------------|-----------|--------------------------|------------------------------|-------------------------------|--------------------------------|
| BW (Kg)                                         | Before NI | 67.1 (2.2)               | 78.9 (7.3)                   | 93.5 (8.1)                    | 128.0 (12.9)                   |
|                                                 | After NI  | 63.3 (2.4)               | 74.2 (9.1)                   | 89.3 (9.7)                    | 116.7 (7.3)                    |
|                                                 | Direction | ↓                        | ↓                            | ↓                             | ↓                              |
|                                                 | p-value   | 0.052                    | 0.048                        | 0.265                         | 0.369                          |
| FM (Kg)                                         | Before NI | 23.3 (2.8)               | 34.0 (4.6)                   | 41.0 (3.6)                    | 52.8 (16.0)                    |
|                                                 | After NI  | 20.5 (3.9)               | 29.6 (5.3)                   | 37.1 (3.9)                    | 44.4 (6.4)                     |
|                                                 | Direction | ↓                        | ↓                            | ↓                             | ↓                              |
|                                                 | p-value   | 0.057                    | 0.054                        | 0.001                         | 0.474                          |
| MM (Kg)                                         | Before NI | 41.6 (1.4)               | 38.0 (14.0)                  | 49.0 (3.9)                    | 71.7 (5.0)                     |
|                                                 | After NI  | 40.6 (1.4)               | 42.5 (3.7)                   | 49.7 (6.3)                    | 68.7 (0.8)                     |
|                                                 | Direction | ↓                        | ↑                            | ↑                             | ↓                              |
|                                                 | p-value   | 0.175                    | 0.723                        | 0.615                         | 0.916                          |
| WC (cm)                                         | Before NI | 85.0 (4.6)               | 102.0 (7.1)                  | 114.1 (5.8)                   | 129.0 (6.6)                    |
|                                                 | After NI  | 81.0 (7.3)               | 98.5 (7.6)                   | 107.4 (14.0)                  | 123.5 (3.5)                    |
|                                                 | Direction | ↓                        | ↓                            | ↓                             | ↓                              |
|                                                 | p-value   | 0.424                    | 0.054                        | 0.640                         | 0.430                          |

BW = bodyweight, FM = fat-mass, M = Mean, MM = muscle mass, SD = Standard deviation, WC = waist circumference.

**Table S2.** Differences in the means of Shannon index before and after the nutritional intervention (NI) by BMI categories, evaluated by one-way ANOVA with repeated measures. We observed a significant increase in alpha diversity in patients with class I obesity. No statistically significant results were obtained in all the other categories.

| BMI category            | M (SD) before NI | M (SD) after NI | Direction | p     |
|-------------------------|------------------|-----------------|-----------|-------|
| Overweight (N=3)        | 3.50 (0.56)      | 3.49 (0.41)     | ↓         | 0.497 |
| Obesity class I (N=8)   | 3.49 (0.33)      | 3.52 (0.33)     | ↑         | 0.007 |
| Obesity class II (N=9)  | 3.17 (0.69)      | 3.10 (0.88)     | ↓         | 0.323 |
| Obesity class III (N=3) | 3.84 (0.29)      | 3.87 (0.61)     | ↑         | 0.508 |

M = Mean, SD = Standard deviation.

**Table S3.** Comparison of the Bray-Curtis distance between different BMI categories, evaluated by Permutational Multivariate Analysis of Variance (PERMANOVA). No statistically significant results were obtained both at baseline and after the nutritional intervention (NI).

| PERMANOVA results before NI | PERMANOVA results after NI |
|-----------------------------|----------------------------|
| p = 0.796                   | p = 0.090                  |
| R <sup>2</sup> = 0.105      | R <sup>2</sup> = 0.187     |
| F = 0.743                   | F = 1.457                  |

12 **Table S4.** Comparison of the Bray-Curtis distance between males and females, evaluated by Permutational  
 13 Multivariate Analysis of Variance (PERMANOVA). No statistically significant results were obtained both at baseline  
 14 and after the nutritional intervention (NI).

| PERMANOVA results before NI | PERMANOVA results after NI |
|-----------------------------|----------------------------|
| p = 0.539                   | p = 0.649                  |
| R <sup>2</sup> = 0.039      | R <sup>2</sup> = 0.031     |
| F = 0.865                   | F = 0.661                  |

15 **Table S5.** Differences in the ratio Firmicutes/Bacteroidetes before and after the nutritional intervention (NI) by BMI  
 16 categories, evaluated by one-way ANOVA with repeated measures. No statistically significant results were obtained  
 17 in all the different categories.

| BMI category            | M (SD) before NI | M (SD) after NI | Direction | p     |
|-------------------------|------------------|-----------------|-----------|-------|
| Overweight (N=3)        | 3.19 (2.05)      | 2.10 (2.10)     | ↓         | 0.699 |
| Obesity class I (N=8)   | 7.68 (5.62)      | 3.21 (4.46)     | ↓         | 0.109 |
| Obesity class II (N=9)  | 3.72 (5.60)      | 2.09 (1.64)     | ↓         | 0.457 |
| Obesity class III (N=3) | 1.46 (1.01)      | 1.64 (1.18)     | ↑         | 0.791 |

M = Mean, SD = Standard deviation

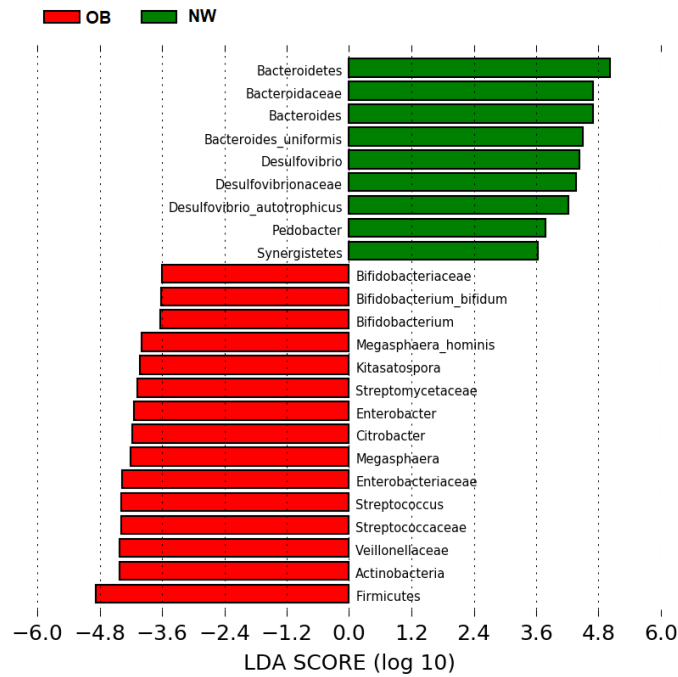

18 **Figure S1.** LEfSe algorithm evaluating the differences in bacterial relative abundance between obese and overweight  
 19 patients (OB) and normal-weight healthy controls (NW). Analysis restricted to female patients (N = 20). Results are  
 20 ranked by the Linear Discriminant Analysis value (LDA score): bacteria in red were more expressed abundant in  
 21 OB, while bacteria in green were more abundant in NW. All the results were confirmed after FDR adjustment.  
 22

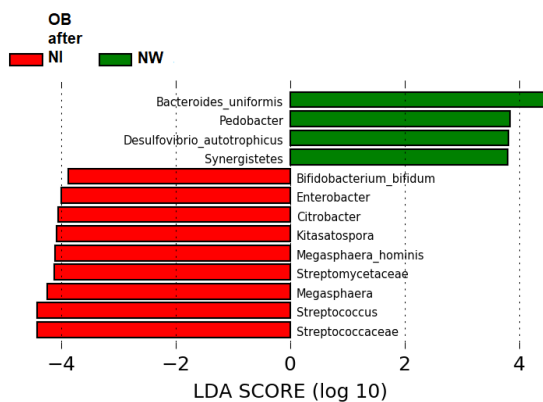

23

24

25

26

27

28

**Figure S2.** LEfSe algorithm evaluating the differences in bacterial relative abundance between obese and overweight patients (OB) after the nutritional intervention (NI) and normal-weight healthy controls (NW). Analysis restricted to female patients (N = 20). Results are ranked by the Linear Discriminant Analysis value (LDA score): bacteria in red were more expressed abundant in OB, while bacteria in green were more abundant in NW. All the results were confirmed after FDR adjustment.

29

**Table S6.** Significant changes in the bacterial relative abundance after the nutritional intervention in female patients (N = 20).

| Phylum             | Family              | Genus                  | Species                    | Median (IQR) at T0      | Median (IQR) at T3 | Prevalent direction of change (N) | P             | q      |       |
|--------------------|---------------------|------------------------|----------------------------|-------------------------|--------------------|-----------------------------------|---------------|--------|-------|
| Bacteroidetes      | Bacteroidaceae      | <i>Bacteroides</i>     | <i>B. cellulosyliticus</i> | 0.019 (0.060)           | 0.042 (0.300)      | ↑ (17)                            | 0.012         | 0.266  |       |
|                    |                     |                        | <i>B. rodentium</i>        | 0.764 (0.858)           | 1.461 (2.577)      | ↑ (14)                            | 0.023         | 0.278  |       |
|                    |                     |                        | <i>B. uniformis</i>        | 0.827 (1.011)           | 2.017 (2.640)      | ↑ (14)                            | 0.015         | 0.266  |       |
|                    | Paraprevotellaceae  | Parabacteroides        |                            |                         | 0.186 (0.432)      | 0.472 (1.192)                     | ↑ (15)        | 0.037  | 0.347 |
|                    | Porphyromonadaceae  |                        |                            |                         | 0.725 (0.607)      | 1.427 (2.054)                     | ↑ (14)        | 0.030  | 0.325 |
|                    |                     |                        |                            | <i>P. distasonis</i>    | 0.253 (0.351)      | 0.394 (0.646)                     | ↑ (15)        | 0.030  | 0.325 |
|                    | Sphingobacteriaceae |                        |                            | <i>Sphingobacterium</i> | <i>S. shayense</i> | 0.041 (0.045)                     | 0.077 (0.089) | ↑ (15) | 0.023 |
|                    |                     | Prevotellaceae         | <i>Prevotella</i>          | <i>P. stercorea</i>     | 0 (0)              | 0 (0.001)                         | ≡ (13), ↑ (7) | 0.018  | 0.266 |
|                    | Firmicutes          | Acidaminococcaceae     | <i>Acidaminococcus</i>     | <i>A. fermentans</i>    | 0.003 (0.010)      | 0.018 (0.029)                     | ↑ (14)        | 0.037  | 0.347 |
|                    |                     |                        | <i>Dialister</i>           | <i>D. invisus</i>       | 0.002 (0.003)      | 0.003 (0.010)                     | ↓ (15)        | 0.048  | 0.406 |
| Erysipelotricaceae |                     | <i>Catenibacterium</i> |                            | 0.002 (0.102)           | 0.005 (0.180)      | ↑ (16)                            | 0.005         | 0.266  |       |
| Lachnospiraceae    |                     | <i>Coproccoccus</i>    | <i>C. eutactus</i>         | 0.003 (0.062)           | 0.016 (0.371)      | ↑ (18)                            | 0.002         | 0.266  |       |
|                    |                     | <i>Dorea</i>           |                            | 0.379 (0.639)           | 0.112 (0.514)      | ↓ (15)                            | 0.040         | 0.361  |       |
|                    |                     | <i>Roseburia</i>       | <i>R. faecis</i>           | 0.437 (0.773)           | 0.283 (0.374)      | ↓ (15)                            | 0.030         | 0.325  |       |
| Selenomonadaceae   |                     | <i>Megamonas</i>       |                            | 0 (0.001)               | 0 (0)              | ≡ (12), ↓ (7)                     | 0.017         | 0.266  |       |
|                    |                     |                        | <i>M. funiformis</i>       | 0 (0.001)               | 0 (0)              | ≡ (12), ↓ (8)                     | 0.012         | 0.266  |       |
|                    |                     | Streptococcaceae       |                            |                         | 0.233 (0.376)      | 0.140 (0.145)                     | ↓ (14)        | 0.015  | 0.266 |
|                    |                     |                        | <i>Streptococcus</i>       |                         | 0.222 (0.383)      | 0.114 (0.146)                     | ↓ (14)        | 0.015  | 0.266 |
|                    |                     | <i>Streptococcus</i>   | <i>S. vestibularis</i>     | 0.042 (0.064)           | 0.013 (0.035)      | ↓ (17)                            | 0.008         | 0.266  |       |
|                    | Veillonellaceae     | <i>Veillonella</i>     |                            | 0.057 (0.118)           | 0.151 (0.266)      | ↑ (16)                            | 0.015         | 0.266  |       |

Median = median values of the bacterial relative abundance before (T0) and after (T3) NI (bacterial relative abundance is expressed as percentage from 0 to 100); IQR = interquartile range calculated as the difference between upper and lower quartiles; N = number of patients that reported the most prevalent direction of change in the bacterial relative abundance (↓ = reduced after NI, ↑ = increased after NI, ≡ = no different after NI). Results were obtained by the Wilcoxon test for paired data performed on R software (v. 3.5.2). q = p adjusted for Benjamini and Hochberg's false discovery rate (FDR) correction test for multiple comparisons.

**Table S7.** Metadata of the participants included in the study. Overweight and obese patients (OB) = 23, Normal-weight controls (NW) = 46.

| <i>Id</i> | <i>Group</i> | <i>Sex</i> | <i>Age</i> | <i>Waist circumference (cm)</i> | <i>FM (%)</i> | <i>FM (kg)</i> | <i>MM (kg)</i> | <i>BMR (kcal)</i> | <i>BMI</i> | <i>Daily caloric intake (Kcal)</i> | <i>Carbohydrates intake %</i> | <i>Lipids intake %</i> | <i>Saturated lipids intake/1000 kcal</i> | <i>Daily proteins intake (gr)</i> | <i>Daily fiber intake (gr)</i> | <i>MedDietScore</i> | <i>Current Smoking status</i> | <i>Former Smoking status</i> | <i>Current Alcohol consumption</i> | <i>Hypertension</i> | <i>Dyslipidemia</i> | <i>Insuline resistance</i> | <i>Type II diabetes</i> |
|-----------|--------------|------------|------------|---------------------------------|---------------|----------------|----------------|-------------------|------------|------------------------------------|-------------------------------|------------------------|------------------------------------------|-----------------------------------|--------------------------------|---------------------|-------------------------------|------------------------------|------------------------------------|---------------------|---------------------|----------------------------|-------------------------|
| N002F     | OB           | Female     | 42         | 102                             | 42.1          | 36.2           | 47.4           | 1538              | 31.6       | 2271                               | 40                            | 38                     | 38                                       | 125                               | 6                              | 19                  | Yes                           | No                           | Rare                               | No                  | No                  | No                         | No                      |
| N004F     | OB           | Female     | 66         | 115                             | 40.7          | 33.9           | 46.8           | 1491              | 39.0       | 1680                               | 47                            | 31                     | 29                                       | 92                                | 18                             | 33                  | No                            | No                           | None                               | Yes                 | No                  | No                         | No                      |
| N005F     | OB           | Female     | 57         | 86                              | 35.8          | 24.8           | 42.3           | 1340              | 26.8       | 1396                               | 52                            | 27                     | 28                                       | 71                                | 27                             | 33                  | Yes                           | No                           | Rare                               | No                  | No                  | No                         | No                      |
| N006F     | OB           | Male       | 45         | 126                             | 39.9          | 44.7           | 64.0           | 2054              | 38.8       | 2962                               | 43                            | 39                     | 38                                       | 133                               | 15                             | 20                  | Yes                           | No                           | Rare                               | Yes                 | No                  | Yes                        | No                      |
| N007F     | OB           | Female     | 53         | 135                             | 50.2          | 71.0           | 66.9           | 2231              | 40.9       | 2188                               | 53                            | 30                     | 39                                       | 86                                | 12                             | 31                  | No                            | No                           | None                               | Yes                 | No                  | No                         | No                      |
| N008F     | OB           | Female     | 61         | 89                              | 37.3          | 25.0           | 40.0           | 1274              | 29.8       | 2694                               | 41                            | 34                     | 40                                       | 64                                | 17                             | 23                  | No                            | No                           | None                               | Yes                 | No                  | No                         | No                      |
| N009F     | OB           | Female     | 45         | 110                             | 44.1          | 39.1           | 47.1           | 1537              | 39.4       | 1921                               | 49                            | 36                     | 36                                       | 77                                | 19                             | 30                  | No                            | No                           | Rare                               | No                  | No                  | No                         | No                      |
| N011F     | OB           | Male       | 40         | 122                             | 35.3          | 40.8           | 71.1           | 2273              | 40.5       | 2572                               | 56                            | 31                     | 42                                       | 86                                | 19                             | 27                  | Yes                           | No                           | Moderate                           | No                  | No                  | No                         | No                      |
| N012F     | OB           | Female     | 50         | 113                             | 44.8          | 38.5           | 45.1           | 1474              | 34.0       | 1964                               | 49                            | 37                     | 40                                       | 67                                | 9                              | 24                  | No                            | Yes                          | Moderate                           | No                  | No                  | No                         | No                      |
| N014F     | OB           | Female     | 49         | 111                             | 46.3          | 44.5           | 49.1           | 1609              | 37.6       | 1470                               | 43                            | 41                     | 39                                       | 64                                | 16                             | 29                  | No                            | No                           | None                               | No                  | No                  | No                         | No                      |
| N016F     | OB           | Female     | 55         | 112                             | 44.1          | 38.5           | 46.3           | 1503              | 38.3       | 1025                               | 50                            | 39                     | 33                                       | 71                                | 5                              | 30                  | No                            | Yes                          | Moderate                           | No                  | No                  | No                         | No                      |
| N020F     | OB           | Female     | 57         | 98                              | 42.6          | 35.2           | 45.0           | 1452              | 31.1       | 1483                               | 41                            | 44                     | 45                                       | 52                                | 9                              | 30                  | No                            | No                           | Rare                               | No                  | No                  | No                         | No                      |
| N022F     | OB           | Female     | 48         | 106                             | 45.2          | 42.7           | 49.2           | 1606              | 35.1       | 1908                               | 49                            | 32                     | 45                                       | 86                                | 17                             | 35                  | No                            | No                           | None                               | No                  | No                  | Yes                        | No                      |
| N023F     | OB           | Male       | 49         | 130                             | 36.5          | 46.6           | 77.0           | 2476              | 42.6       | 1530                               | 53                            | 29                     | 36                                       | 73                                | 18                             | 31                  | No                            | No                           | None                               | Yes                 | Yes                 | Yes                        | No                      |
| N024F     | OB           | Female     | 52         | 112                             | 46.5          | 44.2           | 40.2           | 1580              | 37.2       | 1515                               | 61                            | 26                     | 43                                       | 51                                | 15                             | 36                  | Yes                           | No                           | Moderate                           | No                  | No                  | No                         | No                      |
| N026F     | OB           | Female     | 58         | 99                              | 45.3          | 36.6           | 4.0            | 1376              | 33.2       | 1052                               | 45                            | 35                     | 36                                       | 59                                | 14                             | 27                  | No                            | No                           | None                               | No                  | Yes                 | No                         | No                      |
| N027F     | OB           | Female     | 59         | 94                              | 40.5          | 27.0           | 37.6           | 1220              | 31.7       | 751                                | 61                            | 24                     | 48                                       | 29                                | 6                              | 30                  | Yes                           | No                           | None                               | No                  | No                  | No                         | No                      |
| N028F     | OB           | Female     | 67         | 116                             | 42.2          | 38.7           | 50.4           | 1611              | 36.8       | 1870                               | 56                            | 24                     | 39                                       | 71                                | 16                             | 35                  | No                            | No                           | Rare                               | No                  | Yes                 | No                         | Yes                     |
| N029F     | OB           | Female     | 32         | 80                              | 31.0          | 20.0           | 42.6           | 1366              | 27.0       | 1625                               | 43                            | 38                     | 49                                       | 74                                | 9                              | 27                  | No                            | No                           | Rare                               | No                  | No                  | No                         | No                      |
| N035F     | OB           | Female     | 56         | 108                             | 44.3          | 36.3           | 43.3           | 1410              | 33.7       | 2076                               | 56                            | 33                     | 32                                       | 57                                | 24                             | 28                  | No                            | Yes                          | None                               | No                  | Yes                 | No                         | No                      |
| N037F     | OB           | Female     | 62         | 98                              | 40.6          | 27.9           | 38.8           | 1254              | 34.6       | 1821                               | 49                            | 37                     | 38                                       | 62                                | 12                             | 37                  | No                            | Yes                          | Rare                               | No                  | Yes                 | No                         | No                      |
| N039F     | OB           | Female     | 67         | 96                              | 40.1          | 31.9           | 45.2           | 1438              | 33.5       | 1779                               | 33                            | 40                     | 71                                       | 14                                | 37                             | No                  | Yes                           | Moderate                     | Yes                                | Yes                 | No                  | No                         |                         |
| N044F     | OB           | Female     | 53         | 120                             | 45.5          | 42.3           | 48.1           | 1570              | 35.9       | 1358                               | 59                            | 27                     | 37                                       | 49                                | 5                              | 26                  | No                            | No                           | None                               | Yes                 | No                  | No                         | Yes                     |
| BD001     | NW           | Male       | 58         | 87                              | NA            | NA             | NA             | NA                | 24.2       | 1825                               | 52                            | 23                     | 25                                       | 80                                | 18                             | 43                  | No                            | No                           | None                               | No                  | No                  | No                         | No                      |
| BD002     | NW           | Female     | 50         | 79                              | NA            | NA             | NA             | NA                | 24.4       | 1433                               | 52                            | 25                     | 31                                       | 56                                | 20                             | 35                  | No                            | No                           | Rare                               | No                  | No                  | No                         | No                      |

| <i>Id</i> | <i>Group</i> | <i>Sex</i> | <i>Age</i> | <i>Waist circumference (cm)</i> | <i>FM (%)</i> | <i>FM (kg)</i> | <i>MM (kg)</i> | <i>BMR (kcal)</i> | <i>BMI</i> | <i>Daily caloric intake (Kcal)</i> | <i>Carbohydrates intake %</i> | <i>Lipids intake %</i> | <i>Saturated lipids intake/Total lipids intake (%)</i> | <i>Daily proteins intake (gr)</i> | <i>Daily fiber intake (gr)</i> | <i>MedDietScore</i> | <i>Current Smoking status</i> | <i>Former Smoking status</i> | <i>Current Alcohol consumption</i> | <i>Hypertension</i> | <i>Dyslipidemia</i> | <i>Insuline resistance</i> | <i>Type II diabetes</i> |
|-----------|--------------|------------|------------|---------------------------------|---------------|----------------|----------------|-------------------|------------|------------------------------------|-------------------------------|------------------------|--------------------------------------------------------|-----------------------------------|--------------------------------|---------------------|-------------------------------|------------------------------|------------------------------------|---------------------|---------------------|----------------------------|-------------------------|
| BD003     | NW           | Female     | 29         | 75                              | NA            | NA             | NA             | NA                | 23.7       | 1378                               | 49                            | 26                     | 32                                                     | 54                                | 22                             | 30                  | No                            | No                           | None                               | No                  | No                  | No                         | No                      |
| BD005     | NW           | Female     | 60         | 72                              | NA            | NA             | NA             | NA                | 21.6       | 1410                               | 54                            | 31                     | 34                                                     | 50                                | 23                             | 37                  | No                            | No                           | Rare                               | No                  | No                  | No                         | No                      |
| BD006     | NW           | Female     | 58         | 70                              | NA            | NA             | NA             | NA                | 19.1       | 1289                               | 55                            | 30                     | 32                                                     | 60                                | 21                             | 31                  | No                            | No                           | None                               | No                  | No                  | No                         | No                      |
| BD009     | NW           | Female     | 45         | 72                              | NA            | NA             | NA             | NA                | 20.7       | 1324                               | 53                            | 22                     | 31                                                     | 63                                | 24                             | 24                  | No                            | No                           | Moderate                           | No                  | No                  | No                         | No                      |
| BD011     | NW           | Female     | 39         | 71                              | NA            | NA             | NA             | NA                | 18.9       | 1267                               | 47                            | 27                     | 30                                                     | 67                                | 17                             | 36                  | No                            | No                           | Rare                               | No                  | No                  | No                         | No                      |
| BD012     | NW           | Male       | 27         | 80                              | NA            | NA             | NA             | NA                | 19.3       | 1621                               | 50                            | 25                     | 27                                                     | 66                                | 16                             | 38                  | No                            | No                           | Moderate                           | No                  | No                  | No                         | No                      |
| BD017     | NW           | Female     | 25         | 70                              | NA            | NA             | NA             | NA                | 19         | 1267                               | 49                            | 29                     | 29                                                     | 57                                | 15                             | 31                  | Yes                           | No                           | None                               | No                  | No                  | No                         | No                      |
| BD019     | NW           | Female     | 29         | 73                              | NA            | NA             | NA             | NA                | 19.2       | 1321                               | 50                            | 20                     | 28                                                     | 54                                | 25                             | 28                  | No                            | No                           | Moderate                           | No                  | No                  | No                         | No                      |
| BD020     | NW           | Male       | 53         | 86                              | NA            | NA             | NA             | NA                | 23.7       | 1780                               | 48                            | 25                     | 31                                                     | 78                                | 19                             | 33                  | No                            | No                           | Rare                               | No                  | No                  | No                         | No                      |
| BD026     | NW           | Female     | 30         | 72                              | NA            | NA             | NA             | NA                | 21.4       | 1410                               | 52                            | 20                     | 29                                                     | 52                                | 20                             | 39                  | No                            | No                           | Moderate                           | No                  | No                  | No                         | No                      |
| BD028     | NW           | Female     | 45         | 70                              | NA            | NA             | NA             | NA                | 20.6       | 1423                               | 54                            | 19                     | 20                                                     | 56                                | 23                             | 35                  | No                            | No                           | Rare                               | No                  | No                  | No                         | No                      |
| BD029     | NW           | Female     | 24         | 64                              | NA            | NA             | NA             | NA                | 19.1       | 1334                               | 49                            | 27                     | 22                                                     | 53                                | 21                             | 35                  | Yes                           | No                           | Moderate                           | No                  | No                  | No                         | No                      |
| BD032     | NW           | Female     | 63         | 76                              | NA            | NA             | NA             | NA                | 23.4       | 1523                               | 47                            | 25                     | 26                                                     | 51                                | 17                             | 35                  | No                            | No                           | Rare                               | No                  | No                  | No                         | No                      |
| BD039     | NW           | Female     | 33         | 68                              | NA            | NA             | NA             | NA                | 19.2       | 1323                               | 56                            | 30                     | 29                                                     | 59                                | 17                             | 33                  | No                            | No                           | Moderate                           | No                  | No                  | No                         | No                      |
| BD041     | NW           | Male       | 44         | 81                              | NA            | NA             | NA             | NA                | 21         | 1690                               | 53                            | 30                     | 21                                                     | 75                                | 18                             | 37                  | No                            | No                           | Rare                               | No                  | No                  | No                         | No                      |
| BD042     | NW           | Female     | 45         | 74                              | NA            | NA             | NA             | NA                | 20.3       | 1434                               | 52                            | 23                     | 22                                                     | 61                                | 17                             | 29                  | No                            | No                           | Rare                               | No                  | No                  | No                         | No                      |
| BD044     | NW           | Male       | 52         | 87                              | NA            | NA             | NA             | NA                | 23.8       | 1850                               | 54                            | 16                     | 34                                                     | 54                                | 18                             | 38                  | Yes                           | No                           | Rare                               | No                  | No                  | No                         | No                      |
| BD049     | NW           | Female     | 52         | 70                              | NA            | NA             | NA             | NA                | 20.3       | 1345                               | 47                            | 20                     | 27                                                     | 57                                | 24                             | 31                  | No                            | No                           | None                               | No                  | No                  | No                         | No                      |
| BD050     | NW           | Male       | 39         | 85                              | NA            | NA             | NA             | NA                | 24.2       | 1820                               | 49                            | 21                     | 26                                                     | 82                                | 21                             | 38                  | Yes                           | No                           | None                               | No                  | No                  | No                         | No                      |
| BD061     | NW           | Female     | 57         | 73                              | NA            | NA             | NA             | NA                | 22.8       | 1435                               | 50                            | 22                     | 33                                                     | 68                                | 18                             | 33                  | No                            | No                           | Rare                               | No                  | No                  | No                         | No                      |
| BD062     | NW           | Female     | 48         | 75                              | NA            | NA             | NA             | NA                | 22.6       | 1453                               | 51                            | 23                     | 30                                                     | 59                                | 16                             | 32                  | No                            | No                           | Rare                               | No                  | No                  | No                         | No                      |
| BD063     | NW           | Female     | 55         | 72                              | NA            | NA             | NA             | NA                | 22.3       | 1421                               | 55                            | 30                     | 31                                                     | 63                                | 23                             | 34                  | No                            | No                           | Moderate                           | No                  | No                  | No                         | No                      |
| BD064     | NW           | Female     | 60         | 71                              | NA            | NA             | NA             | NA                | 21.8       | 1390                               | 49                            | 28                     | 24                                                     | 60                                | 22                             | 30                  | No                            | No                           | Moderate                           | No                  | No                  | No                         | No                      |
| BD066     | NW           | Female     | 59         | 72                              | NA            | NA             | NA             | NA                | 23.3       | 1456                               | 48                            | 31                     | 28                                                     | 55                                | 20                             | 34                  | Yes                           | No                           | Moderate                           | No                  | No                  | No                         | No                      |
| BD067     | NW           | Female     | 46         | 76                              | NA            | NA             | NA             | NA                | 20.1       | 1324                               | 50                            | 29                     | 27                                                     | 63                                | 21                             | 44                  | No                            | No                           | Rare                               | No                  | No                  | No                         | No                      |
| BD069     | NW           | Female     | 56         | 71                              | NA            | NA             | NA             | NA                | 21.5       | 1423                               | 55                            | 33                     | 26                                                     | 86                                | 22                             | 32                  | No                            | No                           | None                               | No                  | No                  | No                         | No                      |

| <i>Id</i> | <i>Group</i> | <i>Sex</i> | <i>Age</i> | <i>Waist circumference (cm)</i> | <i>FM (%)</i> | <i>FM (kg)</i> | <i>MM (kg)</i> | <i>BMR (kcal)</i> | <i>BMI</i> | <i>Daily caloric intake (Kcal)</i> | <i>Carbohydrates intake %</i> | <i>Lipids intake %</i> | <i>Saturated lipids intake/ Total lipids intake %</i> | <i>Daily proteins intake (gr)</i> | <i>Daily fiber intake (gr)</i> | <i>MedDietScore</i> | <i>Current Smoking status</i> | <i>Former Smoking status</i> | <i>Current Alcohol consumption</i> | <i>Hypertension</i> | <i>Dyslipidemia</i> | <i>Insuline resistance</i> | <i>Type II diabetes</i> |
|-----------|--------------|------------|------------|---------------------------------|---------------|----------------|----------------|-------------------|------------|------------------------------------|-------------------------------|------------------------|-------------------------------------------------------|-----------------------------------|--------------------------------|---------------------|-------------------------------|------------------------------|------------------------------------|---------------------|---------------------|----------------------------|-------------------------|
| BD070     | NW           | Female     | 53         | 72                              | NA            | NA             | NA             | NA                | 23.3       | 1569                               | 53                            | 31                     | 23                                                    | 65                                | 23                             | 30                  | No                            | No                           | None                               | No                  | No                  | No                         | No                      |
| BD071     | NW           | Female     | 62         | 73                              | NA            | NA             | NA             | NA                | 20.28      | 1390                               | 52                            | 30                     | 13                                                    | 64                                | 19                             | 34                  | No                            | No                           | None                               | No                  | No                  | No                         | No                      |
| BD072     | NW           | Female     | 56         | 66                              | NA            | NA             | NA             | NA                | 22.2       | 1410                               | 47                            | 29                     | 21                                                    | 86                                | 18                             | 30                  | No                            | No                           | Rare                               | No                  | No                  | No                         | No                      |
| BD073     | NW           | Female     | 53         | 69                              | NA            | NA             | NA             | NA                | 19.92      | 1321                               | 52                            | 27                     | 33                                                    | 60                                | 25                             | 36                  | No                            | No                           | Rare                               | No                  | No                  | No                         | No                      |
| BD074     | NW           | Female     | 54         | 79                              | NA            | NA             | NA             | NA                | 24.81      | 1678                               | 48                            | 30                     | 32                                                    | 64                                | 19                             | 35                  | No                            | No                           | Rare                               | No                  | No                  | No                         | No                      |
| BD076     | NW           | Female     | 56         | 75                              | NA            | NA             | NA             | NA                | 22.14      | 1543                               | 52                            | 31                     | 31                                                    | 57                                | 17                             | 30                  | No                            | No                           | Rare                               | No                  | No                  | No                         | No                      |
| BD077     | NW           | Female     | 52         | 74                              | NA            | NA             | NA             | NA                | 23.3       | 1567                               | 51                            | 29                     | 30                                                    | 62                                | 26                             | 29                  | No                            | No                           | Rare                               | No                  | No                  | No                         | No                      |
| BD078     | NW           | Female     | 57         | 76                              | NA            | NA             | NA             | NA                | 24         | 1534                               | 55                            | 30                     | 29                                                    | 64                                | 24                             | 36                  | No                            | No                           | None                               | No                  | No                  | No                         | No                      |
| BD079     | NW           | Female     | 52         | 69                              | NA            | NA             | NA             | NA                | 19.2       | 1304                               | 51                            | 27                     | 27                                                    | 58                                | 19                             | 29                  | No                            | No                           | Moderate                           | No                  | No                  | No                         | No                      |
| BD080     | NW           | Female     | 50         | 79                              | NA            | NA             | NA             | NA                | 24.6       | 1678                               | 48                            | 34                     | 26                                                    | 59                                | 10                             | 28                  | Yes                           | No                           | Moderate                           | No                  | No                  | No                         | No                      |
| BD081     | NW           | Female     | 60         | 74                              | NA            | NA             | NA             | NA                | 23.2       | 1567                               | 46                            | 29                     | 30                                                    | 59                                | 18                             | 30                  | No                            | No                           | Rare                               | No                  | No                  | No                         | No                      |
| BD082     | NW           | Female     | 49         | 69                              | NA            | NA             | NA             | NA                | 20.8       | 1308                               | 57                            | 31                     | 29                                                    | 64                                | 17                             | 34                  | Yes                           | No                           | Rare                               | No                  | No                  | No                         | No                      |
| BD083     | NW           | Female     | 50         | 78                              | NA            | NA             | NA             | NA                | 24.6       | 1657                               | 45                            | 28                     | 31                                                    | 65                                | 22                             | 29                  | No                            | No                           | Rare                               | No                  | No                  | No                         | No                      |
| BD084     | NW           | Female     | 71         | 65                              | NA            | NA             | NA             | NA                | 18.1       | 1278                               | 53                            | 32                     | 25                                                    | 54                                | 19                             | 40                  | Yes                           | No                           | Moderate                           | No                  | No                  | No                         | No                      |
| BD085     | NW           | Female     | 43         | 68                              | NA            | NA             | NA             | NA                | 20         | 1480                               | 49                            | 30                     | 23                                                    | 57                                | 24                             | 36                  | No                            | No                           | Rare                               | No                  | No                  | No                         | No                      |
| BD086     | NW           | Female     | 53         | 72                              | NA            | NA             | NA             | NA                | 20.7       | 1400                               | 52                            | 29                     | 34                                                    | 62                                | 23                             | 34                  | No                            | No                           | Rare                               | No                  | No                  | No                         | No                      |
| BD088     | NW           | Female     | 56         | 63                              | NA            | NA             | NA             | NA                | 17.2       | 1256                               | 55                            | 34                     | 27                                                    | 68                                | 20                             | 32                  | No                            | No                           | Rare                               | No                  | No                  | No                         | No                      |
| BD089     | NW           | Female     | 52         | 78                              | NA            | NA             | NA             | NA                | 24.5       | 1610                               | 47                            | 32                     | 29                                                    | 59                                | 21                             | 30                  | No                            | No                           | Rare                               | No                  | No                  | No                         | No                      |
